# Supplementary material for: Do ampharetids take sedimented steps between vents and seeps? Phylogeny and habitat-use of Ampharetidae (Annelida, Terebelliformia) in chemosynthesis-based ecosystems
Source: PubMed Central journal article supplement (PMC5664827; doi:10.1186/s12862-017-1065-1), 2017-10-31

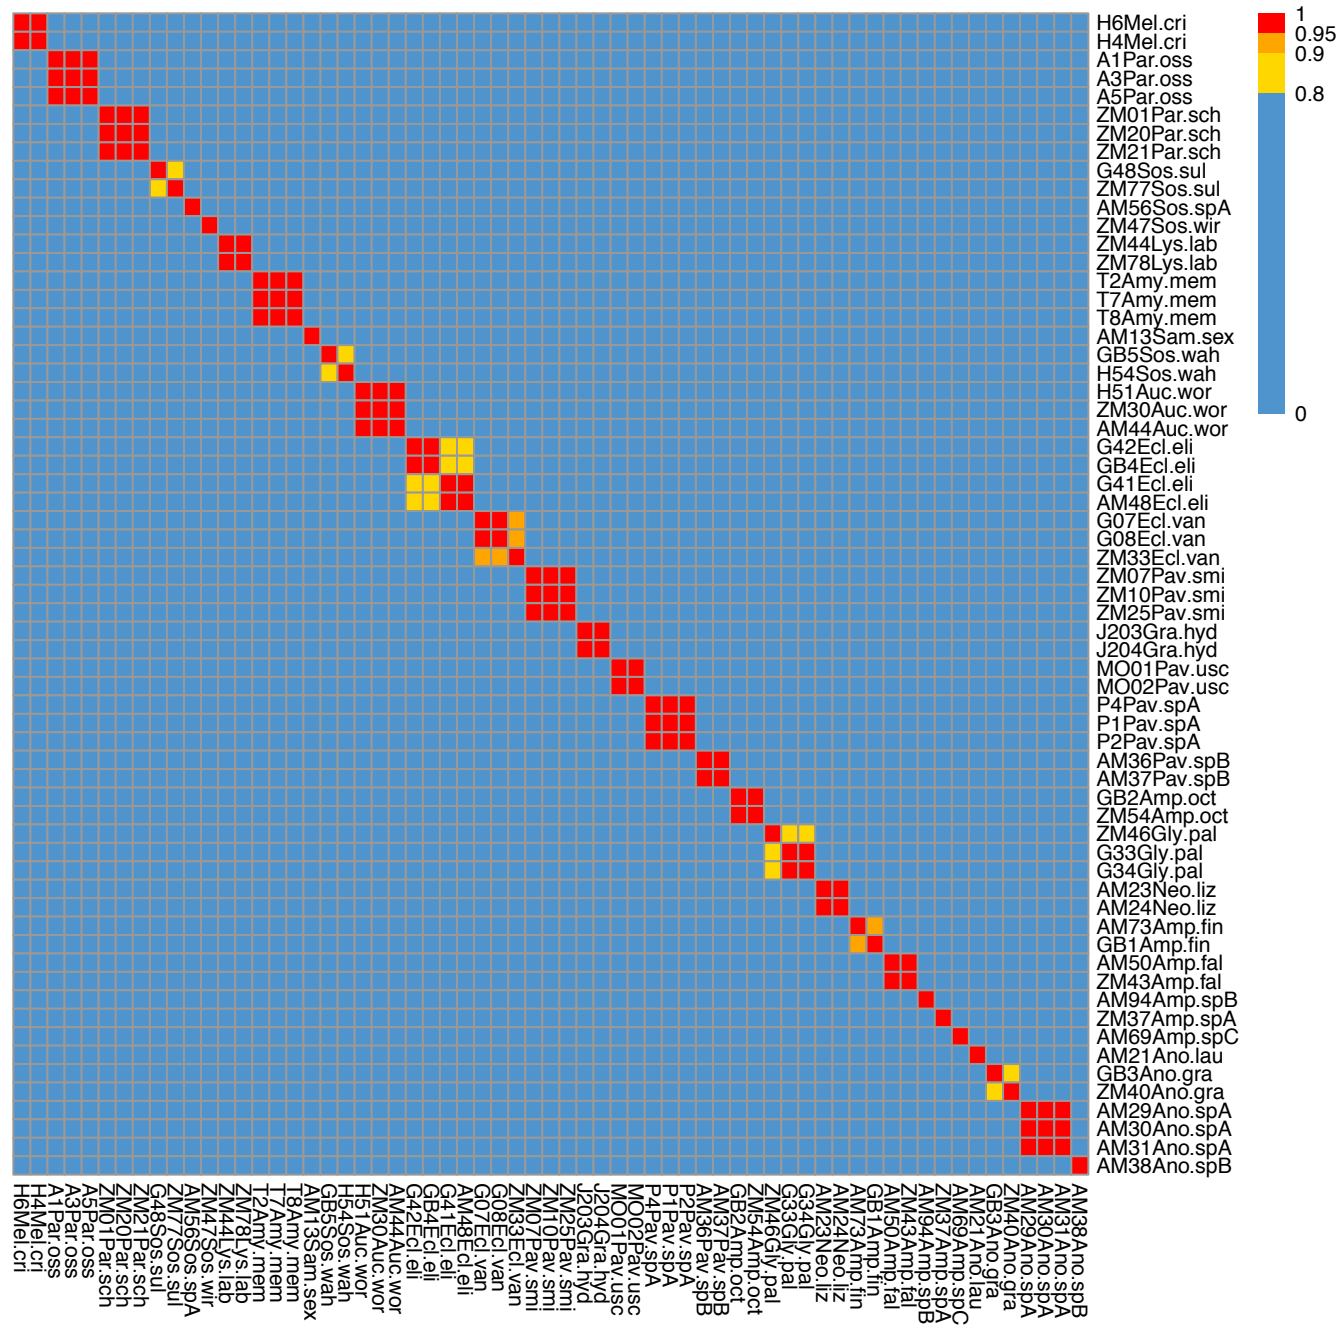

Supplement: 12862_2017_1065_MOESM9_ESM.pdf [file 12862_2017_1065_MOESM9_ESM.pdf]
